# Supplementary material
Source: ML conference proceedings conference paper supplement (https://openreview.net/forum?id=mH9FJi3KTX)
Supplement: supplementary_material [file Magical_NeurIPS_25_supplementary_material.pdf › Magical_NeurIPS_25_supplementary_material.pdf]

---

## Supplementary Material of “*Magical*: Medical Lay Language Generation via Semantic Invariance and Layperson-tailored Adaptation”

---

**Anonymous Author(s)**

Affiliation

Address

email

1 In this supplementary material, we conduct statistical experiments on the results reported in our  
2 main table to evaluate the significance of the performance improvements of *Magical* over recent  
3 state-of-the-art methods. Specifically, we employ the bootstrap method, randomly sampling 95% of  
4 the test set for evaluation and repeating this process 100 times. The mean and standard deviation  
5 across these repeated experiments are reported in Table. 1. The results demonstrate that *Magical*  
6 achieves statistically significant improvements compared to recent works in the literature.

Table 1: Performance comparison of Prompt, various LoRA variants, and *Magical* across three backbone LLMs on three MLLG datasets. All evaluation metrics are defined such that higher values indicate better performance (†). In each group of experiments, the value before the parentheses denotes the mean, while the value inside the parentheses denotes the standard deviation.

| Methods              | #Params | Cochrane      |               |               |               | eLife         |               |               |              | Plos_genetics |               |               |               |
|----------------------|---------|---------------|---------------|---------------|---------------|---------------|---------------|---------------|--------------|---------------|---------------|---------------|---------------|
|                      |         | R-1           | R-2           | R-L           | BLEU          | R-1           | R-2           | R-L           | BLEU         | R-1           | R-2           | R-L           | BLEU          |
| LLaMA3.2-3B-Instruct |         |               |               |               |               |               |               |               |              |               |               |               |               |
| Prompt               | N/A     | 39.80 (0.054) | 11.37 (0.042) | 36.51 (0.051) | 5.29 (0.037)  | 37.82 (0.082) | 8.22 (0.047)  | 35.47 (0.083) | 3.07 (0.033) | 37.89 (0.079) | 7.78 (0.049)  | 35.08 (0.074) | 4.13 (0.037)  |
| LoRA                 | 36M     | 39.98 (0.155) | 16.31 (0.122) | 37.68 (0.151) | 10.35 (0.127) | 46.69 (0.127) | 13.47 (0.071) | 44.57 (0.121) | 7.35 (0.072) | 44.91 (0.087) | 13.63 (0.086) | 41.42 (0.081) | 8.80 (0.096)  |
| rsLoRA               | 36M     | 40.87 (0.193) | 16.38 (0.131) | 38.46 (0.184) | 10.23 (0.177) | 45.41 (0.132) | 13.02 (0.080) | 43.30 (0.131) | 7.10 (0.059) | 43.77 (0.137) | 13.92 (0.090) | 40.55 (0.131) | 7.81 (0.099)  |
| DoRA                 | 37M     | 40.07 (0.184) | 16.29 (0.128) | 37.85 (0.178) | 10.29 (0.161) | 42.98 (0.167) | 12.03 (0.069) | 40.89 (0.159) | 6.17 (0.047) | 41.15 (0.148) | 12.80 (0.099) | 38.42 (0.138) | 6.44 (0.088)  |
| PISSA                | 36M     | 39.72 (0.182) | 16.14 (0.127) | 37.36 (0.172) | 10.51 (0.166) | 42.88 (0.122) | 12.00 (0.069) | 40.85 (0.118) | 6.26 (0.049) | 43.53 (0.141) | 13.93 (0.089) | 40.47 (0.136) | 7.80 (0.099)  |
| Magical              | 24M     | 45.31 (0.164) | 19.39 (0.150) | 42.34 (0.164) | 16.65 (0.190) | 49.14 (0.061) | 14.67 (0.050) | 46.89 (0.063) | 8.29 (0.049) | 47.50 (0.105) | 15.46 (0.087) | 44.02 (0.102) | 10.22 (0.095) |
| LLaMA3.1-8B-Instruct |         |               |               |               |               |               |               |               |              |               |               |               |               |
| Prompt               | N/A     | 41.68 (0.057) | 12.50 (0.047) | 38.61 (0.058) | 6.22 (0.044)  | 35.83 (0.082) | 9.45 (0.043)  | 33.37 (0.076) | 1.86 (0.024) | 39.13 (0.078) | 8.66 (0.043)  | 36.16 (0.076) | 4.66 (0.042)  |
| LoRA                 | 62M     | 40.25 (0.170) | 16.59 (0.114) | 37.57 (0.168) | 12.11 (0.174) | 49.40 (0.063) | 14.88 (0.048) | 47.29 (0.065) | 8.53 (0.041) | 47.56 (0.123) | 16.34 (0.102) | 43.98 (0.115) | 11.53 (0.124) |
| rsLoRA               | 62M     | 43.30 (0.132) | 18.11 (0.117) | 40.62 (0.128) | 12.89 (0.160) | 49.33 (0.097) | 15.00 (0.075) | 47.26 (0.094) | 8.70 (0.057) | 42.18 (0.127) | 12.86 (0.082) | 39.36 (0.117) | 6.87 (0.071)  |
| DoRA                 | 64M     | 43.24 (0.143) | 18.29 (0.116) | 40.60 (0.142) | 13.49 (0.162) | 48.47 (0.095) | 14.66 (0.059) | 46.40 (0.093) | 8.43 (0.044) | 42.47 (0.139) | 13.04 (0.089) | 39.58 (0.130) | 7.17 (0.078)  |
| PISSA                | 62M     | 42.94 (0.146) | 17.80 (0.118) | 40.22 (0.141) | 13.91 (0.180) | 48.81 (0.102) | 14.64 (0.074) | 46.73 (0.101) | 8.38 (0.051) | 39.63 (0.155) | 11.62 (0.097) | 37.25 (0.146) | 5.62 (0.078)  |
| Magical              | 42M     | 45.74 (0.153) | 19.54 (0.144) | 42.82 (0.158) | 16.70 (0.191) | 50.43 (0.071) | 15.48 (0.053) | 48.01 (0.068) | 8.66 (0.043) | 48.77 (0.084) | 16.64 (0.089) | 45.06 (0.080) | 11.85 (0.088) |
| Qwen2.5-7B-Instruct  |         |               |               |               |               |               |               |               |              |               |               |               |               |
| Prompt               | N/A     | 44.52 (0.097) | 15.56 (0.080) | 41.51 (0.094) | 11.41 (0.075) | 35.10 (0.098) | 8.86 (0.049)  | 32.29 (0.093) | 1.80 (0.024) | 44.93 (0.092) | 12.50 (0.060) | 41.13 (0.092) | 7.72 (0.053)  |
| LoRA                 | 60M     | 44.20 (0.131) | 19.35 (0.114) | 41.57 (0.134) | 14.48 (0.148) | 47.37 (0.107) | 13.89 (0.057) | 45.41 (0.104) | 7.93 (0.045) | 46.39 (0.138) | 16.29 (0.093) | 42.92 (0.131) | 9.93 (0.113)  |
| rsLoRA               | 60M     | 45.23 (0.125) | 19.48 (0.107) | 42.46 (0.125) | 15.06 (0.161) | 48.72 (0.102) | 14.54 (0.064) | 46.50 (0.102) | 7.76 (0.054) | 46.26 (0.155) | 15.62 (0.105) | 42.87 (0.148) | 9.92 (0.110)  |
| DoRA                 | 61M     | 45.68 (0.135) | 19.66 (0.108) | 42.90 (0.132) | 15.47 (0.152) | 47.36 (0.104) | 13.90 (0.066) | 45.22 (0.102) | 7.70 (0.053) | 46.67 (0.149) | 15.99 (0.098) | 43.27 (0.142) | 10.13 (0.114) |
| PISSA                | 60M     | 44.81 (0.156) | 19.26 (0.140) | 42.07 (0.156) | 14.46 (0.193) | 48.86 (0.099) | 14.46 (0.060) | 46.68 (0.100) | 7.83 (0.043) | 46.81 (0.117) | 15.92 (0.092) | 43.57 (0.108) | 10.48 (0.088) |
| Magical              | 42M     | 47.53 (0.132) | 20.85 (0.133) | 44.52 (0.133) | 17.33 (0.156) | 50.47 (0.067) | 14.97 (0.053) | 48.17 (0.066) | 8.41 (0.041) | 48.54 (0.101) | 16.41 (0.090) | 44.78 (0.095) | 11.50 (0.082) |
